# Supplementary material for: Systematic Analysis of Small RNAs Associated with Human Mitochondria by Deep Sequencing: Detailed Analysis of Mitochondrial Associated miRNA
Source: PLoS One. 2012 Sep 11;7(9):e44873. doi: 10.1371/journal.pone.0044873 (PMC3439422; doi:10.1371/journal.pone.0044873)
Supplement: Table S1 — Annotations of various classes of sRNA associated with mitochondria of HEK293. The total clean sequences obtained from the sRNA libraries were subjected to a series of sequence similarity searches using specific databases (rRNAs, tRNAs, sn/snoRNAs, miRNAs, other non-coding RNAs). The sequences that did not match with any known sequence were categorized as unannotated sequences. All annotations were summarized using tag2annotations software. An overview of sRNAs associated with mitochondria of HEK293. 1 type of sRNA, 2 total number of unique sequences belonging to each category, 3 percentage of unique sequences belonging to each category, 4 total number of all sequences belonging to each category, 5 percentage of total sequences belonging to each category. (XLS) [file pone.0044873.s004.xls]

## Sheet: Sheet1
Category 1	Unique sRNAs2	Percent(%)3	Total sRNAs4	Percent (%)5
Exon antisense	3929	0.0054	6968	0.0004
Exon sense	130469	0.1787	422936	0.0251
Intron antisense	6242	0.0085	11715	0.0007
Intron sense	37754	0.0517	72765	0.0043
miRNA	1956	0.0027	708798	0.0421
piRNA	101	0.0001	956	0.0001
rRNA	140319	0.1921	13135781	0.7811
Repeat	36828	0.0504	81864	0.0049
scRNA	2382	0.0033	18443	0.0011
snRNA	8030	0.011	203999	0.0121
snoRNA	2149	0.0029	34650	0.0021
srpRNA	347	0.0005	29186	0.0017
tRNA	29969	0.041	665393	0.0396
Unannotated	329818	0.4516	1423619	0.0847
Total	730293	1	16817073	1
