# Supplementary material for: Systematic Analysis of Small RNAs Associated with Human Mitochondria by Deep Sequencing: Detailed Analysis of Mitochondrial Associated miRNA
Source: PLoS One. 2012 Sep 11;7(9):e44873. doi: 10.1371/journal.pone.0044873 (PMC3439422; doi:10.1371/journal.pone.0044873)
Supplement: Table S2 — Annotations of various classes of sRNA associated with mitochondria of HeLa. An overview of sRNAs associated with mitochondria of HeLa. 1, 2, 3, 4, 5 same as table S1. (XLS) [file pone.0044873.s005.xls]

## Sheet: Sheet1
Category 1	Unique sRNAs2	Percent(%)3	Total sRNAs 4	Percent(%)5
Exon antisense	1175	0.0032	1500	0.0001
Exon sense	49653	0.1368	196076	0.0119
Intron antisense	3130	0.0086	3432	0.0002
Intron sense	7664	0.0211	8389	0.0005
miRNA	1474	0.0041	426429	0.0258
piRNA	53	0.0001	226	0
rRNA	127189	0.3503	15147302	0.9176
repeat	10010	0.0276	12483	0.0008
scRNA	764	0.0021	2794	0.0002
snRNA	2804	0.0077	18411	0.0011
snoRNA	961	0.0026	4819	0.0003
srpRNA	128	0.0004	1127	0.0001
tRNA	13691	0.0377	144813	0.0088
unannotated	144360	0.3976	539511	0.0327
Total	363056	1	16507312	1
