# Supplementary material for: Systematic Analysis of Small RNAs Associated with Human Mitochondria by Deep Sequencing: Detailed Analysis of Mitochondrial Associated miRNA
Source: PLoS One. 2012 Sep 11;7(9):e44873. doi: 10.1371/journal.pone.0044873 (PMC3439422; doi:10.1371/journal.pone.0044873)
Supplement: Table S5 — The GO term of predicted targets of miRNAs associated with mitochondria (HEK293 and HeLa) belonging to high frequency count category (count >5000). The targets of miRNAs associated with mitochondria (HEK293 and HeLa) belonging to high frequency count category (count >5000) were determined by StarBase and clustered into GO terms using the DAVID gene annotation tool. 1 Number of cluster and enrichment score (ES) >1.05, 2 The gene annotation term, 3 The number of target genes which belonged to GO cluster, 4 Fisher exact p-value representing the degree of enrichment of the GO term, 5 Benjamini correction value for each category. (XLS) [file pone.0044873.s008.xls]

## Sheet: Sheet1
Cluster 1	Term 2	No. of target genes 3	P-Value 4	Benjamini 5
Cluster 1 (ES : 7.5)	GO:0045449~regulation of transcription	86	8.47e-11	1.19e-07
Cluster 2 (ES : 2.75)	GO:0010629~negative regulation of gene expression	22	0.000118	0.027259
Cluster 3 (ES : 2.46)	GO:0051301~cell division	14	0.001452	0.1849
	GO:0007049~cell cycle	24	0.005737	0.201385
Cluster 4 (ES : 2.42)	GO:0016568~chromatin modification	13	0.002312	0.195174
Cluster 5 (ES : 2.13 )	GO:0035195~gene silencing by miRNA	4	0.002665	0.19814
Cluster 6 (ES : 2.04)	GO:0007389~pattern specification process	13	0.001859	0.196039
Cluster 7 (ES : 1.95)	GO:0001701~in utero embryonic development	10	0.002906	0.193893
Cluster 8 (ES : 1.60 )	GO:0042921~glucocorticoid receptor signaling pathway	3	0.005569	0.211877
