# Supplementary material for: Systematic Analysis of Small RNAs Associated with Human Mitochondria by Deep Sequencing: Detailed Analysis of Mitochondrial Associated miRNA
Source: PLoS One. 2012 Sep 11;7(9):e44873. doi: 10.1371/journal.pone.0044873 (PMC3439422; doi:10.1371/journal.pone.0044873)
Supplement: Table S6 — KEGG pathways enriched for targets of miRNAs associated with mitochondria (HEK293 and HeLa) belonging to high frequency count category (count >5000). The targets of miRNAs associated with mitochondria (HEK293 and HeLa) belonging to high frequency count category (count >5000) were determined by StarBase and clustered into KEGG pathways using the DAVID gene annotation tool. 1 KEGG pathway and its ID, 2 the number of target genes, which belong to the pathway, 3 Fisher Exact p-value representing the degree of enrichment, 4 Benjamini correction value for each category. (XLS) [file pone.0044873.s009.xls]

## Sheet: Sheet1
Term 1	No. of target genes 2	P-Value 3	Benjamini 4
hsa04120: Ubiquitin mediated proteolysis	6	0.03358	0.93495
hsa05200: Pathways in cancer	9	0.06473	0.93123
hsa04110: Cell cycle	5	0.08169	0.89696
hsa05222: Small cell lung cancer	4	0.09821	0.8735
