# Supplementary material for: Systematic Analysis of Small RNAs Associated with Human Mitochondria by Deep Sequencing: Detailed Analysis of Mitochondrial Associated miRNA
Source: PLoS One. 2012 Sep 11;7(9):e44873. doi: 10.1371/journal.pone.0044873 (PMC3439422; doi:10.1371/journal.pone.0044873)
Supplement: Table S7 — The GO term of predicted targets of miRNAs associated with mitochondria (HEK293 and HeLa) belonging to low frequency count category (count <5000). The targets of miRNAs associated with mitochondria (HEK293 and HeLa) belonging to low frequency count category (count <5000) were determined by StarBase and clustered into GO term using the DAVID gene annotation tool. 1, 2, 3, 4, 5 same as table S5. (XLS) [file pone.0044873.s010.xls]

## Sheet: Sheet1
Cluster 1	Term 2	No. of target genes 3	P-Value 4	Benjamini 5
Cluster 1 (ES : 8.32)	GO:0045449~regulation of transcription	278	9.54e-27	2.78e-23
	GO:0051252~regulation of RNA metabolic process	175	1.4e-11	8.14e-09
Cluster 2 (ES : 9.02)	GO:0006357~regulation of transcription from RNA polymerase II promoter	93	1.68e-12	1.63e-09
	GO:0010629~negative regulation of gene expression	71	1.39e-11	1.01e-08
	GO:0031327~negative regulation of cellular biosynthetic process	74	1.11e-10	4.62e-08
	GO:0045934~negative regulation of nucleobase, nucleoside, nucleotide and nucleic acid metabolic process	65	8.38e-09	1.75e-06
Cluster 3 (ES : 7.03)	GO:0010628~positive regulation of gene expression	68	9.13e-08	1.27e-05
	GO:0016563~transcription activator activity	53	1.48e-07	1.69e-05
	GO:0009891~positive regulation of biosynthetic process	76	2.3e-07	3.04e-05
	GO:0031328~positive regulation of cellular biosynthetic process	75	2.67e-07	3.39e-05
