# Supplementary material for: Systematic Analysis of Small RNAs Associated with Human Mitochondria by Deep Sequencing: Detailed Analysis of Mitochondrial Associated miRNA
Source: PLoS One. 2012 Sep 11;7(9):e44873. doi: 10.1371/journal.pone.0044873 (PMC3439422; doi:10.1371/journal.pone.0044873)
Supplement: Table S11 — The GO term of predicted targets of putative novel miRNAs associated with mitochondria of HeLa. The targets of putative novel miRNAs associated with mitochondria of HeLa were determined by StarBase and clustered into GO term using the DAVID gene annotation tool. 1, 2, 3, 4, 5 same as table S5. (XLS) [file pone.0044873.s014.xls]

## Sheet: Sheet1
Cluster 1	Term 2	No. of target genes 3	P-Value 4	Benjamini 5
Cluster 1 (ES : 4.81)	GO:0045449~regulation of transcription	44	2.16e-07	0.000235
	GO:0051252~regulation of RNA metabolic process	35	4.23e-07	0.000154
Cluster 2 (ES : 2.70)	GO:0010629~negative regulation of gene expression	14	0.000139	0.03715
	GO:0045934~negative regulation of nucleic acid metabolic process	12	0.00206	0.18457
Cluster 3 (ES : 1.67)	GO:0045893~positive regulation of transcription, DNA-dependent	11	0.00391	0.22217
	GO:0045935~positive regulation of nucleic acid metabolic process	12	0.00901	0.24556
	GO:0031328~positive regulation of cellular biosynthetic process	12	0.01713	0.29914
Cluster 4 (ES : 1.57)	GO:0022403~cell cycle phase	11	0.0014	0.17372
	GO:0051329~interphase of mitotic cell cycle	5	0.00842	0.25029
Cluster 5 (ES : 1.54)	GO:0006915~apoptosis	11	0.0184	0.30342
	GO:0042981~regulation of apoptosis	12	0.04722	0.49577
Cluster 6 (ES : 1.53)	GO:0009725~response to hormone stimulus	10	0.0022	0.181
	GO:0006468~protein amino acid phosphorylation	13	0.00549	0.21322
	GO:0007254~JNK cascade	4	0.01078	0.2558
	GO:0001932~regulation of protein amino acid phosphorylation	6	0.01116	0.25272
	GO:0032268~regulation of cellular protein metabolic process	10	0.01136	0.24659
	GO:0031098~stress-activated protein kinase signaling pathway	4	0.01288	0.25971
	GO:0051174~regulation of phosphorus metabolic process	10	0.01305	0.25794
	GO:0044093~positive regulation of molecular function	11	0.01554	0.28441
	GO:0007257~activation of JUN kinase activity	3	0.01718	0.29514
Cluster 7 (ES : 1.17)	GO:0040029~regulation of gene expression, epigenetic	5	0.003	0.19637
	GO:0005694~chromosome	8	0.02196	0.41461
