# Supplementary material for: Systematic Analysis of Small RNAs Associated with Human Mitochondria by Deep Sequencing: Detailed Analysis of Mitochondrial Associated miRNA
Source: PLoS One. 2012 Sep 11;7(9):e44873. doi: 10.1371/journal.pone.0044873 (PMC3439422; doi:10.1371/journal.pone.0044873)
Supplement: Table S12 — KEGG pathways enriched for targets of putative novel miRNAs associated with mitochondria of HeLa. The targets of putative novel miRNAs associated with mitochondria of HeLa were determined by StarBase and clustered into KEGG pathways using the DAVID gene annotation tool. 1, 2, 3, 4 same as table S6. (XLS) [file pone.0044873.s015.xls]

## Sheet: Sheet1
Term 1	No. of target genes 2	P-Value 3	Benjamini 4
hsa04144: Endocytosis	6	0.01383	0.65304
hsa04115: p53 signaling pathway	4	0.01588	0.45568
hsa04520: Adherens junction	4	0.02208	0.43199
hsa05414: Dilated cardiomyopathy	4	0.03497	0.49153
hsa05200: Pathways in cancer	7	0.04116	0.47213
